# Supplementary material for: Data-driven efficient synthetic exploration of anionic lanthanide-based metal–organic frameworks
Source: Royal Society of Chemistry journal article supplement (doi:10.1039/d2cc04985f), 2022-01-01
Supplement: d2cc04985f2.xlsx [file d2cc04985f2.xlsx]

## Sheet: Sheet2
	XRPD	M/mM	L/mM	L/M	EtOH/mL	DMF/mL	DMF/EtOH	metal	meda	tea	t1	t2	t3	temp	vessel
YU343_3	1	19	25	1.3	1.5	0.5	0.33	Dy	60	140	5	120	12	130	4mL
YU343_4	1	13	50	3.8	1	1	1	Dy	60	140	5	120	12	130	4mL
YU343_6	5	19	13	0.7	1.5	0.5	0.33	Dy	60	140	5	120	12	130	4mL
YU343_7	1	13	25	1.9	1	1	1	Dy	60	140	5	120	12	130	4mL
YU343_11	1	94	25	0.3	1.5	0.5	0.33	Dy	60	140	5	120	12	130	4mL
YU343_12	7	63	50	0.8	1	1	1	Dy	60	140	5	120	12	130	4mL
YU343_13	4	31	75	2.4	0.5	1.5	3	Dy	60	140	5	120	12	130	4mL
YU343_14	1	94	13	0.1	1.5	0.5	0.33	Dy	60	140	5	120	12	130	4mL
YU343_15	1	63	25	0.4	1	1	1	Dy	60	140	5	120	12	130	4mL
YU343_16	7	13	38	2.9	0.5	1.5	3	Dy	60	140	5	120	12	130	4mL
YU343_19	1	94	13	0.1	1.5	0.5	0.33	Dy	60	140	5	120	12	130	4mL
YU343_20	7	63	25	0.4	1	1	1	Dy	60	140	5	120	12	130	4mL
YU343_21	4	31	38	1.2	0.5	1.5	3	Dy	60	140	5	120	12	130	4mL
YU343_22	1	94	6	0.1	1.5	0.5	0.33	Dy	60	140	5	120	12	130	4mL
YU343_23	1	63	13	0.2	1	1	1	Dy	60	140	5	120	12	130	4mL
YU343_24	7	31	19	0.6	0.5	1.5	3	Dy	60	140	5	120	12	130	4mL
YU344_1	8	38	5	0.1	1.5	0.5	0.33	Dy	200	400	5	48	12	130	4mL
YU344_2	1	25	10	0.4	1	1	1	Dy	200	400	5	48	12	130	4mL
YU344_3	2	13	15	1.2	0.5	1.5	3	Dy	200	400	5	48	12	130	4mL
YU344_4	1	38	13	0.3	1.5	0.5	0.33	Dy	200	400	5	48	12	130	4mL
YU344_5	2	25	25	1	1	1	1	Dy	200	400	5	48	12	130	4mL
YU344_6	2	13	38	2.9	0.5	1.5	3	Dy	200	400	5	48	12	130	4mL
YU344_7	8	38	5	0.1	1.5	0.5	0.33	Dy	400	400	5	48	12	130	4mL
YU344_8	1	25	10	0.4	1	1	1	Dy	400	400	5	48	12	130	4mL
YU344_9	1	13	15	1.2	0.5	1.5	3	Dy	400	400	5	48	12	130	4mL
YU344_10	1	38	13	0.3	1.5	0.5	0.33	Dy	400	400	5	48	12	130	4mL
YU344_11	2	25	25	1	1	1	1	Dy	400	400	5	48	12	130	4mL
YU344_12	2	13	38	2.9	0.5	1.5	3	Dy	400	400	5	48	12	130	4mL
YU344_13	2	15	25	1.7	1.5	0.5	0.33	Dy	200	400	5	48	12	130	4mL
YU344_14	2	10	50	5	1	1	1	Dy	200	400	5	48	12	130	4mL
YU344_15	7	5	75	15	0.5	1.5	3	Dy	200	400	5	48	12	130	4mL
YU344_16	2	15	10	0.7	1.5	0.5	0.33	Dy	200	400	5	48	12	130	4mL
YU344_17	2	10	20	2	1	1	1	Dy	200	400	5	48	12	130	4mL
YU344_18	2	5	30	6	0.5	1.5	3	Dy	200	400	5	48	12	130	4mL
YU344_19	2	15	25	1.7	1.5	0.5	0.33	Dy	400	400	5	48	12	130	4mL
YU344_20	2	10	50	5	1	1	1	Dy	400	400	5	48	12	130	4mL
YU344_21	2	5	75	15	0.5	1.5	3	Dy	400	400	5	48	12	130	4mL
YU344_22	1	15	10	0.7	1.5	0.5	0.33	Dy	400	400	5	48	12	130	4mL
YU344_23	2	10	20	2	1	1	1	Dy	400	400	5	48	12	130	4mL
YU344_24	2	5	30	6	0.5	1.5	3	Dy	400	400	5	48	12	130	4mL
YU345_1	1	38	5	0.1	1.5	0.5	0.33	Dy	200	400	5	48	12	150	4mL
YU345_2	2	25	10	0.4	1	1	1	Dy	200	400	5	48	12	150	4mL
YU345_3	2	13	15	1.2	0.5	1.5	3	Dy	200	400	5	48	12	150	4mL
YU345_4	2	38	13	0.3	1.5	0.5	0.33	Dy	200	400	5	48	12	150	4mL
YU345_5	2	25	25	1	1	1	1	Dy	200	400	5	48	12	150	4mL
YU345_6	2	13	38	2.9	0.5	1.5	3	Dy	200	400	5	48	12	150	4mL
YU345_7	2	38	5	0.1	1.5	0.5	0.33	Dy	400	400	5	48	12	150	4mL
YU345_8	1	25	10	0.4	1	1	1	Dy	400	400	5	48	12	150	4mL
YU345_9	1	13	15	1.2	0.5	1.5	3	Dy	400	400	5	48	12	150	4mL
YU345_10	1	38	13	0.3	1.5	0.5	0.33	Dy	400	400	5	48	12	150	4mL
YU345_11	1	25	25	1	1	1	1	Dy	400	400	5	48	12	150	4mL
YU345_12	2	13	38	2.9	0.5	1.5	3	Dy	400	400	5	48	12	150	4mL
YU345_13	2	15	25	1.7	1.5	0.5	0.33	Dy	200	400	5	48	12	150	4mL
YU345_14	2	10	50	5	1	1	1	Dy	200	400	5	48	12	150	4mL
YU345_15	3	5	75	15	0.5	1.5	3	Dy	200	400	5	48	12	150	4mL
YU345_16	1	15	10	0.7	1.5	0.5	0.33	Dy	200	400	5	48	12	150	4mL
YU345_17	2	10	20	2	1	1	1	Dy	200	400	5	48	12	150	4mL
YU345_18	2	5	30	6	0.5	1.5	3	Dy	200	400	5	48	12	150	4mL
YU345_19	2	15	25	1.7	1.5	0.5	0.33	Dy	400	400	5	48	12	150	4mL
YU345_20	2	10	50	5	1	1	1	Dy	400	400	5	48	12	150	4mL
YU345_21	2	5	75	15	0.5	1.5	3	Dy	400	400	5	48	12	150	4mL
YU345_22	1	15	10	0.7	1.5	0.5	0.33	Dy	400	400	5	48	12	150	4mL
YU345_23	2	10	20	2	1	1	1	Dy	400	400	5	48	12	150	4mL
YU345_24	2	5	30	6	0.5	1.5	3	Dy	400	400	5	48	12	170	4mL
YU346_1	2	38	5	0.1	1.5	0.5	0.33	Dy	200	400	5	48	12	170	4mL
YU346_2	2	25	10	0.4	1	1	1	Dy	200	400	5	48	12	170	4mL
YU346_3	6	13	15	1.2	0.5	1.5	3	Dy	1	400	5	48	12	170	4mL
YU346_4	1	38	13	0.3	1.5	0.5	0.33	Dy	1	400	5	48	12	170	4mL
YU346_5	4	25	25	1	1	1	1	Dy	1	400	5	48	12	170	4mL
YU346_6	3	13	38	2.9	0.5	1.5	3	Dy	1	400	5	48	12	170	4mL
YU346_7	1	38	5	0.1	1.5	0.5	0.33	Dy	400	400	5	48	12	170	4mL
YU346_8	1	25	10	0.4	1	1	1	Dy	400	400	5	48	12	170	4mL
YU346_9	1	13	15	1.2	0.5	1.5	3	Dy	400	400	5	48	12	170	4mL
YU346_10	1	38	13	0.3	1.5	0.5	0.33	Dy	400	400	5	48	12	170	4mL
YU346_11	1	25	25	1	1	1	1	Dy	400	400	5	48	12	170	4mL
YU346_12	2	13	38	2.9	0.5	1.5	3	Dy	400	400	5	48	12	170	4mL
YU346_13	1	15	25	1.7	1.5	0.5	0.33	Dy	200	400	5	48	12	170	4mL
YU346_14	3	10	50	5	1	1	1	Dy	200	400	5	48	12	170	4mL
YU346_15	3	5	75	15	0.5	1.5	3	Dy	1	400	5	48	12	170	4mL
YU346_16	1	15	10	0.7	1.5	0.5	0.33	Dy	1	400	5	48	12	170	4mL
YU346_17	3	10	20	2	1	1	1	Dy	1	400	5	48	12	170	4mL
YU346_18	3	5	30	6	0.5	1.5	3	Dy	1	400	5	48	12	170	4mL
YU346_19	2	15	25	1.7	1.5	0.5	0.33	Dy	400	400	5	48	12	170	4mL
YU346_20	2	10	50	5	1	1	1	Dy	400	400	5	48	12	170	4mL
YU346_21	2	5	75	15	0.5	1.5	3	Dy	400	400	5	48	12	170	4mL
YU346_22	1	15	10	0.7	1.5	0.5	0.33	Dy	400	400	5	48	12	170	4mL
YU346_23	2	10	20	2	1	1	1	Dy	400	400	5	48	12	170	4mL
YU346_24	2	5	30	6	0.5	1.5	3	Dy	400	400	5	48	12	170	4mL
YU347_1	3	6	18	3	0.25	1.75	7	Dy	1	400	5	48	12	170	4mL
YU347_2	3	13	16	1.2	0.5	1.5	3	Dy	1	400	5	48	12	170	4mL
YU347_5	2	13	16	1.2	0.5	1.5	3	Dy	200	400	5	48	12	170	4mL
YU347_6	2	19	13	0.7	0.75	1.25	1.67	Dy	200	400	5	48	12	170	4mL
YU347_7	3	6	27	4.5	0.25	1.75	7	Dy	1	400	5	48	12	170	4mL
YU347_8	3	13	23	1.8	0.5	1.5	3	Dy	1	400	5	48	12	170	4mL
YU347_9	3	19	19	1	0.75	1.25	1.67	Dy	1	400	5	48	12	170	4mL
YU347_10	3	6	27	4.5	0.25	1.75	7	Dy	200	400	5	48	12	170	4mL
YU347_11	2	13	23	1.8	0.5	1.5	3	Dy	200	400	5	48	12	170	4mL
YU347_12	2	19	19	1	0.75	1.25	1.67	Dy	200	400	5	48	12	170	4mL
YU347_13	3	6	35	5.8	0.25	1.75	7	Dy	1	400	5	48	12	170	4mL
YU347_14	3	13	30	2.3	0.5	1.5	3	Dy	1	400	5	48	12	170	4mL
YU347_15	3	19	25	1.3	0.75	1.25	1.67	Dy	1	400	5	48	12	170	4mL
YU347_16	3	6	35	5.8	0.25	1.75	7	Dy	200	400	5	48	12	170	4mL
YU347_17	2	13	30	2.3	0.5	1.5	3	Dy	200	400	5	48	12	170	4mL
YU347_18	2	19	25	1.3	0.75	1.25	1.67	Dy	200	400	5	48	12	170	4mL
YU347_19	3	6	44	7.3	0.25	1.75	7	Dy	1	400	5	48	12	170	4mL
YU347_20	3	13	37	2.8	0.5	1.5	3	Dy	1	400	5	48	12	170	4mL
YU347_21	3	19	31	1.6	0.75	1.25	1.67	Dy	1	400	5	48	12	170	4mL
YU347_22	2	6	44	7.3	0.25	1.75	7	Dy	200	400	5	48	12	170	4mL
YU347_23	2	13	37	2.8	0.5	1.5	3	Dy	200	400	5	48	12	170	4mL
YU347_24	2	19	31	1.6	0.75	1.25	1.67	Dy	200	400	5	48	12	170	4mL
YU347_25	3	3	88	29.3	0.25	1.75	7	Dy	1	400	5	48	12	170	4mL
YU347_26	1	5	75	15	0.5	1.5	3	Dy	1	400	5	48	12	170	4mL
YU347_27	1	8	63	7.9	0.75	1.25	1.67	Dy	1	400	5	48	12	170	4mL
YU347_28	2	3	88	29.3	0.25	1.75	7	Dy	200	400	5	48	12	170	4mL
YU347_29	2	5	75	15	0.5	1.5	3	Dy	200	400	5	48	12	170	4mL
YU347_30	2	8	63	7.9	0.75	1.25	1.67	Dy	200	400	5	48	12	170	4mL
YU347_31	3	3	61	20.3	0.25	1.75	7	Dy	1	400	5	48	12	170	4mL
YU347_32	3	5	53	10.6	0.5	1.5	3	Dy	1	400	5	48	12	170	4mL
YU347_34	2	3	61	20.3	0.25	1.75	7	Dy	200	400	5	48	12	170	4mL
YU347_35	2	5	53	10.6	0.5	1.5	3	Dy	200	400	5	48	12	170	4mL
YU347_36	2	8	44	5.5	0.75	1.25	1.67	Dy	200	400	5	48	12	170	4mL
YU347_37	3	3	44	14.7	0.25	1.75	7	Dy	1	400	5	48	12	170	4mL
YU347_38	3	5	37	7.4	0.5	1.5	3	Dy	1	400	5	48	12	170	4mL
YU347_40	2	3	44	14.7	0.25	1.75	7	Dy	200	400	5	48	12	170	4mL
YU347_41	2	5	37	7.4	0.5	1.5	3	Dy	200	400	5	48	12	170	4mL
YU347_42	2	8	31	3.9	0.75	1.25	1.67	Dy	200	400	5	48	12	170	4mL
YU347_43	3	3	35	11.7	0.25	1.75	7	Dy	1	400	5	48	12	170	4mL
YU347_44	3	5	30	6	0.5	1.5	3	Dy	1	400	5	48	12	170	4mL
YU347_45	3	8	25	3.1	0.75	1.25	1.67	Dy	1	400	5	48	12	170	4mL
YU347_46	3	3	35	11.7	0.25	1.75	7	Dy	200	400	5	48	12	170	4mL
YU347_47	2	5	30	6	0.5	1.5	3	Dy	200	400	5	48	12	170	4mL
YU347_48	2	8	25	3.1	0.75	1.25	1.67	Dy	200	400	5	48	12	170	4mL
